# Supplementary material
Source: PubMed Central journal article supplement (PMC7840432)
Supplement: 10-1055-s-0040-1721481-s200125ra.pdf [file 10-1055-s-0040-1721481-s200125ra.pdf]

## Supplementary Material

```

1. library(dplyr)
2.
3. recordlist <- read.csv("./data.csv")
4.
5. recordlist <- recordlist %>%
6.   filter(LOINC=="76007-4") %>%
7.   mutate(measurement_datetime = as.POSIXct(
8.     strptime(
9.       recordlist$measurement_datetime, format = "%Y-%m-%dT%H:%M:%SZ")
10.    ))
11.
12. pbw_calc_frame <- recordlist %>%
13.   group_by(caseid) %>%
14.   filter(measurement_datetime == max(measurement_datetime)) %>%
15.   select(c(caseid, patientid, sex, bodyheight))
16.
17. pbw_calc_frame <- pbw_calc_frame %>%
18.   mutate(pbw_crit = 8.8 * ifelse(sex == "LA2-8",
19.                                 50 + 0.91 * (bodyheight - 152.4),
20.                                 ifelse(sex == "LA3-6",
21.                                       45.5 + 0.91 * (bodyheight - 152.4),
22.                                       NA)))

```

```

1. results <- recordlist %>%
2.   left_join(pbw_calc_frame %>% select(c(caseid, pbw_crit)),
3.             by = "caseid",
4.             suffixes = c("", "")) %>%
5.   group_by(caseid) %>%
6.   mutate(mean_value = mean(value), mean_pbw_crit = mean(pbw_crit)) %>%
7.   select(c(caseid, mean_value, mean_pbw_crit)) %>%
8.   distinct() %>%
9.   filter(mean_value > mean_pbw_crit)

```
